# Supplementary material
Source: bioRxiv or medRxiv preprint supplement (https://www.medrxiv.org/highwire/filestream/74466/field_highwire_adjunct_files/0/2020.03.16.20037077-1.pdf)
Supplement: Supplementary file [file 2020.03.16.20037077-1.pdf]

# Table of Contents

|    |                                                                                                    |    |
|----|----------------------------------------------------------------------------------------------------|----|
| 1  |                                                                                                    |    |
| 2  | Extended Data.....                                                                                 | 2  |
| 3  | Extended Data Table 1. Lifestyle information and socioeconomic status of the Chinese               |    |
| 4  | subjects.....                                                                                      | 2  |
| 5  | Extended Data Table 2. Correlation between GM biodiversity and BMD variation.....                  | 4  |
| 6  | Extended Data Table 3. BMD-associated bacterial species and covariates in various skeletal         |    |
| 7  | sites.....                                                                                         | 5  |
| 8  | Extended Data Table 4. BMD-associated SCFAs and covariates in various skeletal sites.....          | 10 |
| 9  | Extended Data Table 5. Valeric acid-associated bacterial species.....                              | 11 |
| 10 | Extended Data Table 6. Potential causality of <i>Bacteroides vulgatus</i> exposure on valeric acid |    |
| 11 | outcome with MR approach.....                                                                      | 14 |
| 12 | Extended Data Table 7. Characteristics of US post-menopausal Caucasian female cohort....           | 15 |
| 13 | Extended Data Table 8. Regression coefficients between <i>B.vulgatus</i> and varies sites of BMD   |    |
| 14 | .....                                                                                              | 16 |
| 14 | Extended Data Table 9. Chinese subjects exclusion criteria.....                                    | 18 |
| 15 | Extended Data Table 10. SNPs characteristics used in MR analysis.....                              | 19 |
| 16 | Supplementary methods.....                                                                         | 21 |
| 17 | Metagenomic shotgun sequencing and annotation.....                                                 | 21 |
| 18 | Measurement of short chain fatty acids (SCFAs).....                                                | 22 |
| 19 | BMD measurement and bone morphology evaluation in mice in vivo.....                                | 24 |
| 20 | Whole genome sequencing (WGS).....                                                                 | 25 |
| 21 | Online resources.....                                                                              | 27 |
| 22 | Abbreviations.....                                                                                 | 28 |
| 23 |                                                                                                    |    |
| 24 |                                                                                                    |    |

1 **Extended Data**

2 **Extended Data Table 1. Lifestyle information and socioeconomic status of the**  
 3 **Chinese subjects**

| <b>Items</b>              | <b>None</b>                           | <b>Low</b>                  | <b>High</b>     |                 |
|---------------------------|---------------------------------------|-----------------------------|-----------------|-----------------|
| Calcium supplementation   | 301/517 (58.2%)                       | 139/517 (26.9%)             | 77/517 (14.9%)  |                 |
| Exercise                  | 154/517 (29.8%)                       | 48/517 (9.3%)               | 315/517 (60.9%) |                 |
| Family annual income      | 139/517 (26.9%)                       | 221/517 (42.7%)             | 157/517 (30.4%) |                 |
|                           | <b>Yes</b>                            | <b>No</b>                   |                 |                 |
| Alcohol consumption       | 146/517 (28.2%)                       | 371/517 (71.8%)             |                 |                 |
| Smoking                   | 0                                     | 100%                        |                 |                 |
| Physically demanding jobs | 218/517 (42.2%)                       | 299/517 (57.8%)             |                 |                 |
|                           | <b>Less than high school graduate</b> | <b>High school graduate</b> | <b>College</b>  | <b>Graduate</b> |
| Education                 | 153/517 (29.6%)                       | 153/517 (29.6%)             | 195/517 (37.7%) | 16/517 (3.1%)   |

4 Note:

5 Calcium supplementation: None - never had calcium supplementation; Low -  
 6 occasional calcium supplementation; High - daily calcium supplementation. Exercise:  
 7 None - do not have exercise habit; Low - exercise less than 2.5 hours per week; High -  
 8 exercise more than 2.5 hours per week. Family annual income: None - low family  
 9 income; Low - lower than the local average income but higher than the low family

1 income; High - higher than the local average income.

2

1 **Extended Data Table 2. Correlation between GM biodiversity and BMD**  
 2 **variation**

| Phenotypes       | Shannon index    |                 |                 | Optimal Kernel             |                            |
|------------------|------------------|-----------------|-----------------|----------------------------|----------------------------|
|                  | partial $\gamma$ | <i>p</i> -value | <i>q</i> -value | <i>p</i> -value of MIREKAT | <i>q</i> -value of MIREKAT |
| <b>UD-R BMD</b>  | -0.081           | 0.072           | 0.144           | 0.005                      | 0.028                      |
| <b>UD-U BMD</b>  | -0.098           | 0.029           | 0.093           | 0.014                      | 0.028                      |
| <b>UD-RU BMD</b> | -0.097           | 0.031           | 0.093           | 0.010                      | 0.028                      |
| HTOT BMD         | -0.043           | 0.344           | 0.516           | 0.812                      | 0.812                      |
| FN BMD           | 0.004            | 0.931           | 0.931           | 0.733                      | 0.812                      |
| L1-L4 BMD        | 0.031            | 0.493           | 0.592           | 0.475                      | 0.713                      |

3 Note:

4 partial  $\gamma$  - coefficient of the correlation between the Shannon index and BMD  
 5 variation with partial Spearman correlation analysis; *p*-value - *p*-value of the  
 6 correlation coefficient  $\gamma$ ; *q*-value - false discovery rate of the partial Spearman  
 7 correlation analysis; Optimal Kernel - optimal kernel based on weighted and  
 8 unweighted UniFrac distance matrices and Bray-Curtis distance; *p*-value of MIREKAT  
 9 - *p*-value of the association between GM biodiversity and BMD variation with  
 10 MiRKAT; *q*-value of MIREKAT - false discovery rate of the MIREKAT analyses.

11 Bolded BMDs were the significant ones associated with GM biodiversity (*p*-values <  
 12 0.05).

13 Abbreviations:

14 GM - gut microbiota; MiRKAT - microbiome regression based on the kernel  
 15 association test; BMD - bone mineral density; UD-R - ultra-distal radius; UD-U -  
 16 ultra-distal ulna; UD-RU - ultra-distal radius and ulna; HTOT - left total hip; FN -  
 17 femoral neck; L1-L4 - lumbar spine.

1 Extended Data Table 3. BMD-associated bacterial species and covariates in various skeletal sites

| Variables                    | L1-L4 BMD     |                   | UD-RU BMD     |                   | HTOT BMD      |                   | FN BMD        |                   |
|------------------------------|---------------|-------------------|---------------|-------------------|---------------|-------------------|---------------|-------------------|
|                              | $\beta$       | <i>p</i> -value   | $\beta$       | <i>p</i> -value   | $\beta$       | <i>p</i> -value   | $\beta$       | <i>p</i> -value   |
| <b>YSM</b>                   | <b>-0.028</b> | <b>&lt; 0.001</b> | <b>-0.016</b> | <b>&lt; 0.001</b> | <b>-0.016</b> | <b>0.008</b>      | <b>-0.013</b> | <b>0.027</b>      |
| Age                          | -0.002        | 0.384             | -0.001        | 0.136             | -0.001        | 0.594             | -0.002        | 0.228             |
| <b>BMI</b>                   | <b>0.014</b>  | <b>&lt; 0.001</b> | <b>0.006</b>  | <b>&lt; 0.001</b> | <b>0.015</b>  | <b>&lt; 0.001</b> | <b>0.011</b>  | <b>&lt; 0.001</b> |
| <b>Exercise</b>              | <b>0.025</b>  | <b>0.001</b>      | 0.003         | 0.246             | <b>0.014</b>  | <b>0.015</b>      | <b>0.016</b>  | <b>0.007</b>      |
| <b>Family annual income</b>  | <b>0.023</b>  | <b>0.017</b>      | 0.000         | 0.999             | 0.008         | 0.259             | <b>0.014</b>  | <b>0.048</b>      |
| <b>FSH</b>                   | 0.000         | 0.657             | 0.000         | 0.439             | 0.000         | 0.126             | <b>0.000</b>  | <b>0.013</b>      |
| <b>Bacteroides_vulgatus</b>  | <b>-0.027</b> | <b>0.032</b>      | -0.004        | 0.369             | -0.011        | 0.253             | -0.012        | 0.216             |
| Faecalibacterium_prausnitzii | 0.003         | 0.789             | 0.002         | 0.564             | 0.000         | 0.972             | 0.005         | 0.520             |
| Bacteroides_uniformis        | -0.002        | 0.867             | -0.003        | 0.489             | -0.004        | 0.629             | -0.006        | 0.483             |
| Bacteroides_fragilis         | 0.000         | 0.986             | -0.001        | 0.853             | 0.011         | 0.402             | 0.001         | 0.951             |
| Escherichia_coli             | 0.000         | 0.840             | 0.000         | 0.840             | 0.000         | 0.784             | 0.000         | 0.969             |
| Bacteroides_stercoris        | 0.000         | 0.975             | 0.002         | 0.428             | 0.006         | 0.198             | 0.006         | 0.192             |

| Variables                     | L1-L4 BMD |                 | UD-RU BMD    |                 | HTOT BMD |                 | FN BMD  |                 |
|-------------------------------|-----------|-----------------|--------------|-----------------|----------|-----------------|---------|-----------------|
|                               | $\beta$   | <i>p</i> -value | $\beta$      | <i>p</i> -value | $\beta$  | <i>p</i> -value | $\beta$ | <i>p</i> -value |
| <b>Bacteroides_ovatus</b>     | -0.003    | 0.850           | <b>0.011</b> | <b>0.046</b>    | 0.005    | 0.639           | 0.007   | 0.497           |
| Bacteroides_massiliensis      | -0.001    | 0.896           | 0.006        | 0.088           | -0.008   | 0.259           | -0.006  | 0.382           |
| Eubacterium_eligens_cag72     | -0.002    | 0.697           | -0.001       | 0.464           | 0.001    | 0.744           | 0.000   | 0.957           |
| Firmicutes_bacterium_cag65    | -0.001    | 0.803           | -0.001       | 0.707           | 0.001    | 0.798           | 0.001   | 0.868           |
| Eubacterium_rectale           | 0.005     | 0.586           | 0.005        | 0.150           | 0.006    | 0.381           | 0.003   | 0.640           |
| Phascolarctobacterium_sp_cag2 | -0.001    | 0.801           | -0.001       | 0.570           | 0.000    | 0.916           | -0.003  | 0.381           |
| Clostridium_sp_cag7           | 0.007     | 0.359           | 0.005        | 0.059           | 0.009    | 0.104           | 0.008   | 0.176           |
| Bacteroides_coprocola         | 0.007     | 0.403           | 0.002        | 0.624           | 0.008    | 0.185           | 0.004   | 0.483           |
| Roseburia_sp_cag18            | -0.001    | 0.787           | 0.000        | 0.976           | 0.000    | 0.921           | 0.001   | 0.851           |
| Alistipes_putredinis          | 0.001     | 0.885           | 0.000        | 0.838           | 0.002    | 0.600           | 0.002   | 0.653           |
| Roseburia_inulinivorans       | 0.008     | 0.415           | 0.002        | 0.496           | 0.010    | 0.145           | 0.006   | 0.387           |
| Roseburia_intestinalis        | -0.008    | 0.440           | -0.002       | 0.701           | -0.004   | 0.606           | -0.009  | 0.268           |
| Bacteroides_caccae            | -0.003    | 0.776           | -0.004       | 0.385           | 0.000    | 0.976           | -0.001  | 0.881           |
| Subdoligranulum_variabile     | -0.005    | 0.477           | 0.001        | 0.655           | 0.001    | 0.857           | 0.000   | 0.999           |

| Variables                                | L1-L4 BMD     |                 | UD-RU BMD |                 | HTOT BMD      |                 | FN BMD        |                 |
|------------------------------------------|---------------|-----------------|-----------|-----------------|---------------|-----------------|---------------|-----------------|
|                                          | $\beta$       | <i>p</i> -value | $\beta$   | <i>p</i> -value | $\beta$       | <i>p</i> -value | $\beta$       | <i>p</i> -value |
| Bacteroides_xylanisolvans                | 0.003         | 0.839           | -0.004    | 0.418           | 0.006         | 0.555           | 0.006         | 0.563           |
| <b>Bacteroides_thetaiotaomicron</b>      | <b>0.027</b>  | <b>0.021</b>    | 0.004     | 0.410           | 0.003         | 0.700           | 0.010         | 0.266           |
| Bacteroides_finegoldii                   | -0.018        | 0.192           | -0.008    | 0.116           | -0.012        | 0.267           | -0.009        | 0.364           |
| Bacteroides_eggerthii                    | 0.009         | 0.313           | 0.002     | 0.480           | -0.001        | 0.907           | 0.001         | 0.834           |
| Parabacteroides_distasonis               | -0.028        | 0.091           | -0.004    | 0.558           | -0.015        | 0.219           | -0.015        | 0.215           |
| Parabacteroides_merdae                   | 0.004         | 0.615           | -0.002    | 0.451           | 0.001         | 0.850           | -0.002        | 0.717           |
| Bacteroides_cellulosilyticus             | 0.014         | 0.202           | 0.005     | 0.292           | 0.013         | 0.129           | 0.004         | 0.613           |
| <b>Bacteroides_intestinalis</b>          | -0.015        | 0.278           | -0.006    | 0.283           | <b>-0.021</b> | <b>0.043</b>    | -0.010        | 0.318           |
| Hungatella_hathewayi                     | -0.003        | 0.843           | -0.004    | 0.475           | 0.010         | 0.424           | 0.004         | 0.736           |
| <b>Butyrateproducing_bacterium_ss3/4</b> | <b>-0.024</b> | <b>0.040</b>    | -0.005    | 0.258           | <b>-0.022</b> | <b>0.009</b>    | <b>-0.021</b> | <b>0.014</b>    |
| <b>Clostridium_bolteae</b>               | <b>0.045</b>  | <b>0.036</b>    | 0.014     | 0.072           | 0.023         | 0.152           | 0.020         | 0.201           |
| <b>Bacteroides_sp_9_1_42faa</b>          | <b>0.033</b>  | <b>0.031</b>    | 0.006     | 0.289           | 0.017         | 0.150           | 0.021         | 0.063           |
| Roseburia_hominis                        | 0.015         | 0.179           | -0.001    | 0.781           | 0.003         | 0.755           | 0.003         | 0.682           |
| Clostridium_sp_cag43                     | 0.005         | 0.601           | 0.004     | 0.215           | -0.001        | 0.847           | 0.000         | 0.993           |

| Variables                    | L1-L4 BMD |                 | UD-RU BMD |                 | HTOT BMD |                 | FN BMD  |                 |
|------------------------------|-----------|-----------------|-----------|-----------------|----------|-----------------|---------|-----------------|
|                              | $\beta$   | <i>p</i> -value | $\beta$   | <i>p</i> -value | $\beta$  | <i>p</i> -value | $\beta$ | <i>p</i> -value |
| uncultured_bacterium         | 0.000     | NA              | 0.000     | NA              | 0.000    | NA              | 0.000   | NA              |
| Eubacterium_ventriosum       | -0.003    | 0.801           | -0.001    | 0.880           | -0.002   | 0.798           | 0.005   | 0.506           |
| Blautia_sp_cag37             | -0.002    | 0.843           | -0.005    | 0.122           | -0.006   | 0.399           | -0.001  | 0.857           |
| Clostridium_clostridioforme  | -0.028    | 0.418           | -0.017    | 0.196           | -0.025   | 0.326           | -0.024  | 0.354           |
| Peptoclostridium_difficile   | -0.049    | 0.095           | 0.003     | 0.761           | 0.012    | 0.575           | 0.009   | 0.693           |
| Blautia_wexlerae             | -0.003    | 0.865           | -0.003    | 0.646           | -0.003   | 0.841           | -0.012  | 0.356           |
| Ruminococcus_lactaris        | 0.010     | 0.475           | 0.005     | 0.361           | 0.008    | 0.421           | 0.007   | 0.473           |
| Bilophila_wadsworthia        | 0.000     | NA              | 0.000     | NA              | 0.000    | NA              | 0.000   | NA              |
| Flavonifractor_plautii       | -0.002    | 0.903           | -0.003    | 0.491           | -0.012   | 0.186           | -0.010  | 0.273           |
| Bacteroides_sp_3_1_33faa     | 0.000     | NA              | 0.000     | NA              | 0.000    | NA              | 0.000   | NA              |
| Tyzzarella_nexilis           | 0.017     | 0.388           | 0.004     | 0.606           | 0.014    | 0.366           | 0.005   | 0.737           |
| Dorea_formicigenerans        | 0.018     | 0.535           | -0.003    | 0.779           | -0.021   | 0.353           | 0.003   | 0.900           |
| Lachnospiraceae_bacterium_a4 | 0.000     | NA              | 0.000     | NA              | 0.000    | NA              | 0.000   | NA              |

1 Note:



- 1  $\beta$  - regression coefficient of the association between variable and human BMD variation; *p*-value - *p*-value of the regression coefficient.
- 2 Bolded species were the significant ones associated with BMD (*p*-values < 0.05).
- 3 Abbreviations:
- 4 YSM - years since menopause; BMD - bone mineral density; L1-L4 - lumbar spine; HTOT - left total hip; UD-RU - ultra-distal radius and ulna;
- 5 FN - femoral neck; BMI - body mass index; FSH - follicle stimulating hormone.
- 6

1 **Extended Data Table 4. BMD-associated SCFAs and covariates in various**  
 2 **skeletal sites**

| Variables           | L1-L4 BMD |                 | HTOT BMD |                 | UD-RU BMD |                 |
|---------------------|-----------|-----------------|----------|-----------------|-----------|-----------------|
|                     | $\beta$   | <i>p</i> -value | $\beta$  | <i>p</i> -value | $\beta$   | <i>p</i> -value |
| Intercept           | 0.876     | < 0.001         | 0.609    | < 0.001         | 0.320     | < 0.001         |
| Caproic acid        | 0.008     | 0.726           | -0.010   | 0.531           | -0.002    | 0.854           |
| Isovaleric acid     | -0.015    | 0.284           | 0.005    | 0.660           | -0.002    | 0.724           |
| Butyric acid        | -0.037    | 0.204           | -0.024   | 0.264           | -0.013    | 0.233           |
| Acetic acid         | -0.002    | 0.889           | 0.001    | 0.936           | -0.001    | 0.884           |
| Isobutyric acid     | -0.011    | 0.468           | -0.008   | 0.455           | -0.001    | 0.871           |
| <b>Valeric acid</b> | 0.040     | <b>0.029</b>    | 0.023    | 0.089           | 0.009     | 0.196           |
| <b>YSM</b>          | -0.025    | <b>0.001</b>    | -0.017   | <b>0.002</b>    | -0.016    | < <b>0.001</b>  |
| Age                 | -0.003    | 0.286           | -0.001   | 0.640           | -0.001    | 0.157           |
| <b>BMI</b>          | 0.015     | < <b>0.001</b>  | 0.017    | < <b>0.001</b>  | 0.007     | < <b>0.001</b>  |
| <b>Exercise</b>     | 0.027     | < <b>0.001</b>  | 0.014    | <b>0.012</b>    | 0.003     | 0.249           |

3 Note:

4  $\beta$  - regression coefficient of the association between variable and human BMD variation;

5 *p*-value - *p*-value of the regression coefficient.

6 Bolded contents were the significant ones associated with BMD (*p*-values < 0.05).

7 Abbreviations:

8 SCFAs - short chain fatty acids; YSM - years since menopause; BMD - bone mineral

9 density; L1-L4 - lumbar spine; HTOT - left total hip; UD-RU - ultra-distal radius and

10 ulna; BMI - body mass index.

1 **Extended Data Table 5. Valeric acid-associated bacterial species**

| Variables                     | $\beta$       | <i>p</i> -value   | Lower         | Upper         |
|-------------------------------|---------------|-------------------|---------------|---------------|
| YSM                           | -0.024        | 0.336             | -0.072        | 0.025         |
| Age                           | 0.007         | 0.371             | -0.008        | 0.023         |
| BMI                           | -0.013        | 0.117             | -0.029        | 0.003         |
| FSH                           | 0.000         | 0.560             | -0.002        | 0.001         |
| <b>Bacteroides_vulgatus</b>   | <b>-0.111</b> | <b>0.006</b>      | <b>-0.189</b> | <b>-0.032</b> |
| Faecalibacterium_prausnitzii  | -0.003        | 0.916             | -0.065        | 0.059         |
| Bacteroides_uniformis         | 0.023         | 0.500             | -0.044        | 0.091         |
| Bacteroides_fragilis          | 0.060         | 0.267             | -0.046        | 0.165         |
| Escherichia_coli              | 0.000         | NA                | NA            | NA            |
| Bacteroides_stercoris         | -0.010        | 0.585             | -0.048        | 0.027         |
| Bacteroides_ovatus            | -0.054        | 0.225             | -0.141        | 0.033         |
| Bacteroides_massiliensis      | 0.028         | 0.325             | -0.028        | 0.085         |
| Eubacterium_eligens_cag72     | 0.005         | 0.719             | -0.023        | 0.033         |
| Firmicutes_bacterium_cag65    | 0.021         | 0.229             | -0.014        | 0.056         |
| Eubacterium_rectale           | -0.023        | 0.409             | -0.078        | 0.032         |
| Phascolarctobacterium_sp_cag2 | -0.004        | 0.759             | -0.033        | 0.024         |
| Clostridium_sp_cag7           | -0.041        | 0.087             | -0.089        | 0.006         |
| Bacteroides_coprocola         | -0.018        | 0.503             | -0.069        | 0.034         |
| Roseburia_sp_cag18            | -0.013        | 0.421             | -0.045        | 0.019         |
| <b>Alistipes_putredinis</b>   | <b>0.054</b>  | <b>&lt; 0.001</b> | <b>0.024</b>  | <b>0.084</b>  |
| Roseburia_inulinivorans       | -0.005        | 0.856             | -0.062        | 0.051         |
| Roseburia_intestinalis        | -0.029        | 0.403             | -0.096        | 0.038         |
| <b>Bacteroides_caccae</b>     | <b>0.089</b>  | <b>0.009</b>      | <b>0.023</b>  | <b>0.155</b>  |
| Subdoligranulum_variabile     | 0.005         | 0.837             | -0.040        | 0.049         |
| Bacteroides_xylanisolvens     | -0.021        | 0.625             | -0.103        | 0.062         |

| <b>Variables</b>                    | <b><math>\beta</math></b> | <b><i>p</i>-value</b> | <b>Lower</b>  | <b>Upper</b>  |
|-------------------------------------|---------------------------|-----------------------|---------------|---------------|
| Bacteroides_thetaiotaomicron        | 0.022                     | 0.544                 | -0.049        | 0.093         |
| Bacteroides_finegoldii              | -0.038                    | 0.389                 | -0.124        | 0.048         |
| Bacteroides_eggerthii               | -0.006                    | 0.828                 | -0.059        | 0.047         |
| Parabacteroides_distasonis          | -0.012                    | 0.812                 | -0.115        | 0.090         |
| Parabacteroides_merdae              | -0.013                    | 0.618                 | -0.067        | 0.040         |
| <b>Bacteroides_cellulosilyticus</b> | <b>0.083</b>              | <b>0.021</b>          | <b>0.013</b>  | <b>0.153</b>  |
| <b>Bacteroides_intestinalis</b>     | <b>-0.121</b>             | <b>0.006</b>          | <b>-0.207</b> | <b>-0.034</b> |
| Hungatella_hathewayi                | -0.030                    | 0.550                 | -0.129        | 0.069         |
| Butyrateproducing_bacterium_ss3/4   | 0.030                     | 0.399                 | -0.040        | 0.101         |
| Clostridium_bolteae                 | -0.008                    | 0.899                 | -0.140        | 0.123         |
| Bacteroides_sp_9_1_42faa            | 0.045                     | 0.359                 | -0.051        | 0.140         |
| Roseburia_hominis                   | 0.017                     | 0.630                 | -0.052        | 0.086         |
| Clostridium_sp_cag43                | 0.009                     | 0.753                 | -0.048        | 0.067         |
| uncultured_bacterium                | 0.000                     | NA                    | NA            | NA            |
| Eubacterium_ventriosum              | 0.022                     | 0.520                 | -0.046        | 0.091         |
| Blautia_sp_cag37                    | -0.003                    | 0.913                 | -0.057        | 0.051         |
| Clostridium_clostridioforme         | 0.134                     | 0.216                 | -0.079        | 0.347         |
| Peptoclostridium_difficile          | 0.056                     | 0.543                 | -0.125        | 0.237         |
| Blautia_wexlerae                    | -0.036                    | 0.514                 | -0.143        | 0.072         |
| Ruminococcus_lactaris               | 0.053                     | 0.225                 | -0.033        | 0.139         |
| Bilophila_wadsworthia               | 0.000                     | NA                    | NA            | NA            |
| Flavonifractor_plautii              | -0.066                    | 0.091                 | -0.142        | 0.011         |
| Bacteroides_sp_3_1_33faa            | 0.000                     | NA                    | NA            | NA            |
| Tyzzarella_nexilis                  | -0.072                    | 0.253                 | -0.195        | 0.051         |
| Dorea_formicigenerans               | -0.020                    | 0.827                 | -0.203        | 0.162         |
| Lachnospiraceae_bacterium_a4        | 0.000                     | NA                    | NA            | NA            |

1 Note:

2  $\beta$  - regression coefficient of the association between variables and valeric acid; *p*-value -  
3 *p*-value of the regression coefficient; Lower - lower limit of 95% confidence interval;  
4 Upper - upper limit of 95% confidence interval.

5 Bolded species were the significant ones associated with valeric acid (*p*-values < 0.05).

6 Abbreviations:

7 YSM - years since menopause; BMI - body mass index; FSH - follicle stimulating  
8 hormone.

1 **Extended Data Table 6. Potential causality of *Bacteroides vulgatus* exposure on**  
 2 **valeric acid outcome with MR approach**

| MR methods             | $\beta$ | Standard Error | <i>p</i> -value |
|------------------------|---------|----------------|-----------------|
| Weighted median method | -0.116  | 0.038          | 0.002           |
| MaxLik                 | -0.075  | 0.033          | 0.022           |
| IVW                    | -0.071  | 0.032          | 0.025           |
| MR-Egger               | -0.031  | 0.069          | 0.655           |
| MR-Egger (intercept)   | -0.023  | 0.035          | 0.517           |

3 Note:

4  $\beta$  - regression coefficient of the association between *Bacteroides vulgatus* (as  
 5 exposure) and valeric acid (as outcome) with various MR methods; *p*-value - *p*-value  
 6 of the regression coefficient.

7 Abbreviations:

8 MR - Mendelian randomization; MaxLik - maximum likelihood estimation; IVW -  
 9 inverse-variance weighted.

10

1 **Extended Data Table 7. Characteristics of US post-menopausal Caucasian female**  
 2 **cohort**

| <b>Phenotypes</b>              | <b>Max</b>    | <b>Min</b> | <b>Mean</b>   | <b>Standard Deviation</b> |
|--------------------------------|---------------|------------|---------------|---------------------------|
| Age (years)                    | 80.52         | 60.12      | 66.98         | 5.65                      |
| BMI (kg/m <sup>2</sup> )       | 49.99         | 17.47      | 27.84         | 8.50                      |
| L1-L4 BMD (g/cm <sup>2</sup> ) | 1.53          | 0.63       | 0.92          | 0.17                      |
| HTOT BMD (g/cm <sup>2</sup> )  | 1.21          | 0.44       | 0.80          | 0.12                      |
| FN BMD (g/cm <sup>2</sup> )    | 0.93          | 0.43       | 0.67          | 0.11                      |
| UD-R BMD (g/cm <sup>2</sup> )  | 0.52          | 0.21       | 0.37          | 0.06                      |
| UD-U BMD (g/cm <sup>2</sup> )  | 0.39          | 0.14       | 0.28          | 0.05                      |
|                                | <b>Yes</b>    |            | <b>No</b>     |                           |
| Alcohol drinking               | 47/59 (79.7%) |            | 12/59 (20.3%) |                           |
| Smoking                        | 23/59 (39.0%) |            | 36/59 (61.0%) |                           |
| Regular exercise               | 44/59 (74.6%) |            | 15/59 (25.4%) |                           |

3 **Abbreviations:**

4 BMI - body mass index; BMD - bone mineral density; L1-L4 - lumbar spine; HTOT -  
 5 left total hip; FN - femoral neck; UD-R - ultra-distal radius; UD-U - ultra-distal ulna.

6

1 **Extended Data Table 8. Regression coefficients between *B.vulgatus* and varies**  
2 **sites of BMD**

| Phenotype         | Chinese cohort |                 | the US cohort |                 |
|-------------------|----------------|-----------------|---------------|-----------------|
|                   | $\beta$        | <i>p</i> -value | $\beta$       | <i>p</i> -value |
| Spine (L1-L4) BMD | -0.027         | 0.032           | -0.002        | 0.862           |
| L1 BMD            | -0.027         | 0.027           | -             | -               |
| L2 BMD            | -0.025         | 0.057           | -             | -               |
| L3 BMD            | -0.031         | 0.024           | -             | -               |
| L4 BMD            | -0.029         | 0.042           | -             | -               |
| R-UD BMD          | -0.004         | 0.409           | -0.007        | 0.115           |
| U-UD BMD          | -0.004         | 0.493           | -0.003        | 0.411           |
| RTOT BMD          | -0.006         | 0.212           | -0.008        | 0.147           |
| RU-UD BMD         | -0.004         | 0.369           | -             | -               |
| R-33 BMD          | -0.013         | 0.039           | -             | -               |
| U-33 BMD          | -0.005         | 0.520           | -             | -               |
| RU-33 BMD         | -0.009         | 0.153           | -             | -               |
| UTOT BMD          | -0.003         | 0.598           | -             | -               |
| RUTOT BMD         | -0.005         | 0.328           | -             | -               |
| R-mid BMD         | -              | -               | -0.007        | 0.171           |
| R-13 BMD          | -              | -               | -0.006        | 0.339           |
| HTOT BMD          | -0.011         | 0.253           | -0.018        | 0.029           |
| FN BMD            | -0.012         | 0.216           | -0.012        | 0.084           |
| FN (upper) BMD    | -0.012         | 0.200           | -             | -               |
| FN (lower) BMD    | -0.011         | 0.279           | -             | -               |
| Hip (wards) BMD   | -0.019         | 0.073           | -             | -               |
| Hip (troch) BMD   | -0.011         | 0.198           | -             | -               |
| Hip (FS) BMD      | -0.009         | 0.449           | -             | -               |



|              |   |   |        |       |
|--------------|---|---|--------|-------|
| WB TOT       | - | - | -0.014 | 0.133 |
| WB (sub) TOT | - | - | -0.015 | 0.085 |

---

1 Note:

2 BMD - bone mineral density, L - lumbar spine, R - radius, U - ulna, UD - ultra-distal, TOT - total,

3 FN - femoral neck, FS - femoral shaft, WB - whole body, WB (sub) - whole body except head.

4

1 **Extended Data Table 9. Chinese subjects exclusion criteria**

| Number | Exclusion criteria                                                                                                                                                       |
|--------|--------------------------------------------------------------------------------------------------------------------------------------------------------------------------|
| 1      | Used antibiotics, oestrogens, anticonvulsant or proton pump inhibitor medications in the past three months;                                                              |
| 2      | Underwent hysterectomy or bilateral ovariectomy;                                                                                                                         |
| 3      | Serious residuals from cerebral vascular disease;                                                                                                                        |
| 4      | Diabetes mellitus, except for easily controlled, non-insulin dependent diabetes mellitus;                                                                                |
| 5      | Chronic renal disease manifest by serum creatinine > 1.9 mg/dL;                                                                                                          |
| 6      | Chronic liver diseases;                                                                                                                                                  |
| 7      | Significant chronic lung disease;                                                                                                                                        |
| 8      | Alcohol abuse as defined by those who drink alcohol regularly and cannot control themselves and become intoxicated at least once a week.                                 |
| 9      | Corticosteroid therapy at pharmacologic levels currently, or for more than 6 months duration at any time;                                                                |
| 10     | Treatment with anticonvulsant therapy currently, or for more than 6 months duration at any time;                                                                         |
| 11     | Evidence of other metabolic diseases or inherited bone diseases such as hyper- or hypoparathyroidism, Paget's disease, osteomalacia, osteogenesis imperfecta, or others; |
| 12     | Rheumatoid arthritis, except for minor cases that involve only hand joint and wrist;                                                                                     |
| 13     | Recent major gastrointestinal disease (within the past year) such as celiac disease, post-gastrectomy, Crohn's disease, ulcerative colitis;                              |
| 14     | Any other disease, treatment (e.g., bisphosphonates), or condition that would be an apparent non-genetic factor underlying the variation of BMD.                         |

2

1 **Extended Data Table 10. Characteristics of the SNP used in MR analysis**

| SNP         | Exposure ( <i>B.vulgatus</i> ) |         |                 |       | Outcome (valeric acid) |         |                 |       |
|-------------|--------------------------------|---------|-----------------|-------|------------------------|---------|-----------------|-------|
|             | effect_allele                  | $\beta$ | <i>p</i> -value | se    | effect_allele          | $\beta$ | <i>p</i> -value | se    |
| rs688811    | T                              | -1.288  | 3.95E-06        | 0.276 | T                      | 0.038   | 0.776           | 0.132 |
| rs3219142   | A                              | -1.019  | 3.63E-07        | 0.198 | A                      | 0       | 0.999           | 0.095 |
| rs11682148  | A                              | -1.089  | 6.40E-07        | 0.216 | A                      | -0.060  | 0.555           | 0.101 |
| rs77875633  | G                              | -1.471  | 6.63E-07        | 0.292 | G                      | 0.194   | 0.165           | 0.139 |
| rs36201997  | A                              | -0.794  | 3.77E-06        | 0.170 | A                      | -0.130  | 0.111           | 0.082 |
| rs61870507  | A                              | -0.510  | 2.77E-06        | 0.107 | A                      | 0.064   | 0.215           | 0.051 |
| rs140807263 | A                              | -1.146  | 3.70E-06        | 0.245 | A                      | 0.251   | 0.036           | 0.120 |
| rs1077028   | C                              | -0.401  | 1.34E-07        | 0.075 | C                      | 0.047   | 0.195           | 0.036 |
| rs35903260  | T                              | -0.316  | 8.10E-07        | 0.063 | T                      | 0.059   | 0.052           | 0.030 |
| rs8049150   | G                              | -1.069  | 4.27E-06        | 0.230 | G                      | 0.046   | 0.676           | 0.109 |
| rs1452791   | A                              | 0.313   | 5.30E-06        | 0.068 | A                      | 0.053   | 0.105           | 0.032 |
| rs4892102   | G                              | -0.366  | 9.16E-06        | 0.082 | G                      | 0.092   | 0.016           | 0.038 |

|            |   |        |          |       |   |        |        |       |
|------------|---|--------|----------|-------|---|--------|--------|-------|
| rs17705279 | G | -0.796 | 1.71E-06 | 0.164 | G | 0.094  | 0.231  | 0.078 |
| rs6516034  | A | 0.351  | 4.25E-06 | 0.075 | A | -0.045 | 0.2142 | 0.036 |
| rs2051388  | G | 0.386  | 6.46E-06 | 0.085 | G | -0.041 | 0.316  | 0.040 |

---

1

## 1 **Supplementary methods**

### 2 **Metagenomic shotgun sequencing and annotation**

#### 3 *DNA library construction*

4 We constructed a faecal DNA library by the TruSeq Nano DNA LT Library  
5 Preparation Kit (FC-121-4001, Illumina, San Diego, CA, USA). Faecal DNA was  
6 fragmented by dsDNA Fragmentase (NEB, M0348S, Massachusetts, USA) and  
7 incubated at 37 °C for 30 min. Then, we used the fragmented cDNA to construct  
8 libraries. Blunt-end DNA fragmentation and size selection were performed with  
9 provided sample purification beads. An A-base was added to the blunt ends of each  
10 strand for the preparation of ligation to indexed adapters. These adapters also  
11 contained sequencing primer hybridization sites for single, paired-end, and indexed  
12 reads. The ligated products were amplified with polymerase chain reaction (PCR)  
13 under the following conditions: initial denaturation at 95 °C for 3 min, followed by 8  
14 cycles of 98 °C for 15 sec (denaturation), 60 °C for 15 sec, 72 °C for 30 sec  
15 (extension), then a final elongation at 72 °C for 5 min.

16

#### 17 *Raw data preprocessing and cleaning*

18 Raw sequencing reads were processed in multiple cleaning steps. First, we removed  
19 sequencing adapters from sequencing reads by Cutadapt v1.9. Second, we trimmed  
20 low quality reads by Fqtrim v0.94. We used a sliding-window (size = 6 bp) to  
21 calculate average quality of the bases within this window, and trimmed 3' end of reads

1 when the average quality value dropped below 20. We also discarded the reads when  
2 the length was less than 100 bp and the percentage of "N" was larger than 5% after  
3 trimming. Third, we aligned reads to the host genome by using Bowtie2 v2.2.0, and  
4 removed host genomic contamination. Once quality-filtered reads were obtained, they  
5 were *de novo* assembled to construct metagenomes for each sample by SPAdes  
6 v3.10.0. The coding sequences (CDS) of metagenomic contigs were predicted by  
7 MetaGeneMark v3.26. The CDS of all samples were clustered by CD-HIT v4.6.1 to  
8 obtain unigenes.

9

#### 10 *Taxonomic and functional annotation of unigenes*

11 We used “blastp” function of DIAMOND for unigene alignments. It determines bit  
12 score and expected value (*E*-value) of the computed alignment. The bit score gives an  
13 indication of how good the alignment (hit) is; the higher the score, the better the  
14 alignment. The *E*-value gives an indication of the statistical significance of a given  
15 pairwise alignment; the lower the *E*-value, the more significant the hit. We selected  
16 the best hit with the highest bit score from the all potential hits ( $E\text{-values} \leq 1 \times 10^{-5}$ )  
17 as the respective KEGG Orthology (KO) for each unigene. KOs were further mapped  
18 to GM-associated functional KEGG modules.

19

#### 20 **Measurement of short chain fatty acids (SCFAs)**

21 *Gas chromatography-tandem mass spectrometry (GC-MS/MS)*

1 Serum samples were vortex-mixed with 36% phosphoric acid solution and further  
2 extracted supernatants by liquid-liquid extraction with methyl tert-butyl ether which  
3 containing SCFA stock solutions. Detailed conditions for GC-MS/MS were as follows:  
4 setting the injector temperature at 240 °C, keeping the initial oven temperature at  
5 90 °C for 1 min, then gradually raising it to 140 °C, 160 °C, 200 °C, and 240 °C at a  
6 rate of 10 °C/min, 5 °C/min, 15 °C/min, and 10 °C/min, respectively. Pure helium was  
7 used as a carrier gas at 1.0 ml/min rate. The main conditions of  
8 mass spectrometry included electron impact ion source and multi-reaction monitoring  
9 scan mode. The temperature of the transfer line, ion source, and quad were 240 °C,  
10 230 °C, and 150 °C, respectively. The electron energy was 70 eV, and the solvent  
11 delayed 2.4 min.

12

### 13 *Quality control (QC) and intra-day/inter-day accuracy*

14 Process of quality control (QC) and intra-day/inter-day accuracy were as follows: the  
15 QC samples were composed of SCFA stock solutions dissolved in methyl *tert*-butyl  
16 ether. Then the QC samples were processed in parallel with test samples to analyze  
17 detection stability and repeatability under the same process with an injection volume  
18 of 2 µl. Three QC samples were continuously injected to test the instrument stability.  
19 For every 10 test samples injected, a QC sample was inserted to check for the  
20 repeatability of the instrument.

21 Intra-day and inter-day accuracy were evaluated and reported as CV% of repeatability  
22 at the concentration of each SCFA. The intra-day accuracy is 0.42% - 3.64%, and the

1 inter-day accuracy is 1.12% - 3.40%, indicating a good stability of the instrument.

2

### 3 *Qualitative and quantitative analyses of SCFAs*

4 We performed qualitative and quantitative analysis of SCFAs with Agilent Mass  
5 Hunter software. By using a stock solution containing mixtures of SCFAs, five  
6 calibration standards (concentration range from 0.005 to 8 mg/L) were prepared. Then  
7 we performed GC-MS/MS measurement as described above and integrated the  
8 obtained signals (e.g., retention time and peak area) to calculate relative retention time  
9 and area ratios. Meanwhile, the calibration curves were constructed by plotting the  
10 peak area versus concentration for each individual SCFA. And the slopes of the  
11 calibration curves were determined by performing linear regression analysis. In  
12 addition, average area ratio of blank samples was used as background signal/intercept.  
13 Finally, we calculated the concentrations of SCFAs with the area ratio, average area  
14 ratio blank samples, and slope (see Formula 1).

$$15 \quad \text{Concentration} = \frac{\text{area ratio} - \text{average area ratio blank samples}}{\text{slope}} \quad (1)$$

16

### 17 **BMD measurement and bone morphology evaluation in mice in vivo**

#### 18 *Micro-computed tomography ( $\mu$ CT)*

19 The scanning parameters were as follows: standard model, low X-ray, 96  $\mu\text{m} \times 361$   
20 slice, scan conditions with 48 mm, 360° rotation, and asynchronous.

21



1 *Histomorphometry*

2 The bones were prefixed in 4% paraformaldehyde (Solarbio, Beijing, China) at first.  
3 Samples were then incubated with 10% EDTA (pH 7.4, Solarbio, Beijing, China) until  
4 the bone was easily penetrated through by a needle without any force. Subsequently,  
5 samples were dehydrated in graded ethanol solutions and embedded in paraffin. Then,  
6 for each specimen, 5 serial sections (5  $\mu\text{m}$  thick) were cut on a microtome and stained  
7 with hematoxylin-eosin. Finally, the specimens were examined and photographed  
8 using a high-quality microscope.

9

10 **Whole genome sequencing (WGS)**

11 Qualified genomic DNA samples were randomly fragmented by Covaris technology  
12 and the fragment of 350 bp was obtained after fragment selection. End repair of DNA  
13 fragments was performed and an "A" base was added at the 3'-end of each strand.  
14 Adapters were then ligated to both ends of the DNA fragments, and ligation-mediated  
15 PCR was performed for amplification, single strand separation and cyclization. The  
16 rolling circle amplification was performed to produce DNA Nanoballs. The qualified  
17 pair-end reads were read through on the BGISEQ-500 platform. High throughput  
18 sequencing was performed for each library to ensure that each sample meets the  
19 average sequencing coverage requirement. Sequencing-derived raw image files were  
20 processed by BGISEQ-500 Base-calling software for base-calling with default  
21 parameters. Sequence data of each individual were generated as paired-end reads,

1 which is defined as "raw data" and stored in FASTQ format. Clean reads were  
2 produced by data filtering, including removed reads containing sequencing adapter,  
3 removed reads whose low-quality base ratio (base quality less than or equal to 5) was  
4 more than 50%, removed reads whose unknown base ("N" base) ratio was more than  
5 10%. Then, clean reads of each sample were mapped to the human reference genome  
6 (GRCh38/HG38). Burrows-Wheeler Aligner (BWA) software was used for sequence  
7 alignment. To ensure accurate variant calling, we followed recommended best  
8 practices for variant analysis with the Genome Analysis Toolkit (GATK).

9

## 1 Online resources

---

| Softwares           | URL                                                                                                                                 |
|---------------------|-------------------------------------------------------------------------------------------------------------------------------------|
| Agilent Mass Hunter | <a href="https://www.agilent.com/en/promotions/masshunter-mass-spec">https://www.agilent.com/en/promotions/masshunter-mass-spec</a> |
| BWA                 | <a href="https://sourceforge.net/projects/bio-bwa/">https://sourceforge.net/projects/bio-bwa/</a>                                   |
| CD-HIT v4.6.1       | <a href="http://weizhongli-lab.org/cd-hit/">http://weizhongli-lab.org/cd-hit/</a>                                                   |
| Cutadapt v1.9       | <a href="https://cutadapt.readthedocs.io/">https://cutadapt.readthedocs.io/</a>                                                     |
| DIAMOND             | <a href="http://ab.inf.uni-tuebingen.de/software/diamond/">http://ab.inf.uni-tuebingen.de/software/diamond/</a>                     |
| Fqtrim v0.94        | <a href="http://ccb.jhu.edu/software/fqtrim/">http://ccb.jhu.edu/software/fqtrim/</a>                                               |
| GATK                | <a href="https://www.broadinstitute.org/gatk/">https://www.broadinstitute.org/gatk/</a>                                             |
| IOF                 | <a href="https://www.iofbonehealth.org/">https://www.iofbonehealth.org/</a>                                                         |
| KEGG dataset        | <a href="https://www.genome.jp/kegg/">https://www.genome.jp/kegg/</a>                                                               |
| MetaGeneMark        | <a href="http://exon.gatech.edu/GeneMark/">http://exon.gatech.edu/GeneMark/</a>                                                     |
| PLINK 1.9           | <a href="https://www.cog-genomics.org/plink/1.9/">https://www.cog-genomics.org/plink/1.9/</a>                                       |
| R software v3.5.1   | <a href="https://www.r-project.org/">https://www.r-project.org/</a>                                                                 |
| SPAdes v3.10.0      | <a href="http://cab.spbu.ru/software/spades/">http://cab.spbu.ru/software/spades/</a>                                               |
| Stata 14            | <a href="https://www.stata.com/">https://www.stata.com/</a>                                                                         |

---

2

## 1 Abbreviations

| Abbreviations | Full forms                                  | Abbreviations | Full forms                                          |
|---------------|---------------------------------------------|---------------|-----------------------------------------------------|
| $\gamma$      | correlation coefficient                     | $\beta$       | regression coefficient                              |
| $\mu$ CT      | micro-computed tomography                   | ALP           | alkaline phosphatase                                |
| AR-S          | alizarin red S                              | BMD           | bone mineral density                                |
| BMI           | body mass index                             | BWA           | Burrows-Wheeler Aligner                             |
| CDS           | coding sequence                             | CTX-I         | C-telopeptide of type I collagen                    |
| CV            | coefficient of variation                    | DMEM          | Dulbecco's Modified Eagle Medium                    |
| DXA           | dual energy X-ray absorptiometry            | FBS           | fetal bovine serum                                  |
| ECM           | extracellular matrix                        | ED            | Extended Data                                       |
| FN            | femoral neck                                | FSH           | follicle stimulating hormone                        |
| GC-MS/MS      | gas chromatography-tandem mass spectrometry | GM            | gut microbiota                                      |
| GWAS          | genome-wide association study               | HDAC          | histone deacetylase                                 |
| HTOT          | left total hip                              | IMP           | inosine monophosphate                               |
| IOF           | International osteoporosis foundation       | IVW           | inverse-variance weighted                           |
| IVs           | Instrumental variables                      | KO            | KEGG Orthology                                      |
| L1-L4         | lumbar spine                                | LD            | linkage disequilibrium                              |
| MaxLik        | maximum likelihood estimation               | MiRKAT        | Microbiome Regression-based Kernel Association Test |

| <b>Abbreviations</b> | <b>Full forms</b>                                       | <b>Abbreviations</b> | <b>Full forms</b>                |
|----------------------|---------------------------------------------------------|----------------------|----------------------------------|
| MR                   | Mendelian randomization                                 | NS                   | normal saline                    |
| OC                   | osteocalcin                                             | OP                   | osteoporosis                     |
| OVX                  | ovariectomy                                             | PCR                  | polymerase chain reaction        |
| PMOP                 | postmenopausal osteoporosis                             | QC                   | quality control                  |
| RANKL                | receptor activator of nuclear factor- $\kappa$ B ligand | UD-RU                | ultra-distal radius and ulna     |
| UD-R                 | ultra-distal radius                                     | UD-U                 | ultra-distal ulna                |
| SCFAs                | short chain fatty acids                                 | SD                   | standard deviation               |
| SNPs                 | single nucleotide polymorphisms                         | TPM                  | transcripts per kilobase million |
| TRAP                 | tartrate-resistant acid phosphatase                     | VA                   | valeric acid                     |
| WGS                  | whole genome sequencing                                 | YSM                  | years since menopause            |

1
